# Supplementary material for: Pathological Relevance of Post-Translationally Modified Alpha-Synuclein (pSer87, pSer129, nTyr39) in Idiopathic Parkinson’s Disease and Multiple System Atrophy
Source: MDPI journal article supplement (doi:10.3390/cells11050906), 2022-03-06
Supplement: s1 [file s1]

### Supplementary Figure S3

#### Bland-Altman analysis : LB scores

|                         |        |
|-------------------------|--------|
| Bias                    | 9.657  |
| SD of bias              | 21.48  |
| 95% Limits of Agreement |        |
| From                    | -32.45 |
| To                      | 51.76  |

A

#### %Difference vs. average: Bland-Altman of LB Scores

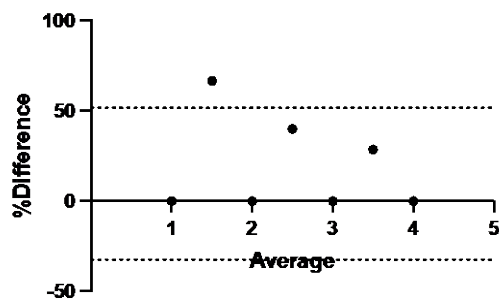

#### Bland Altman analysis: LN Scores

|                         |        |
|-------------------------|--------|
| Bias                    | 7.059  |
| SD of bias              | 25.89  |
| 95% Limits of Agreement |        |
| From                    | -43.70 |
| To                      | 57.81  |

B

#### %Difference vs. average: Bland-Altman of LN Scores

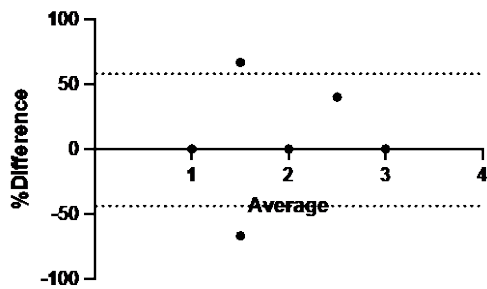

Figure S3: Intra-rater (one scorer blind to status of cases) analysis of Bland Altman analysis of IHC scoring: A) lewy body scores; B) LN scores. There was ~84% agreement for LBs and ~86% agreement for LN scores.
