# Supplementary material for: Pathological Relevance of Post-Translationally Modified Alpha-Synuclein (pSer87, pSer129, nTyr39) in Idiopathic Parkinson’s Disease and Multiple System Atrophy
Source: MDPI journal article supplement (doi:10.3390/cells11050906), 2022-03-06
Supplement: s1 [file s1]

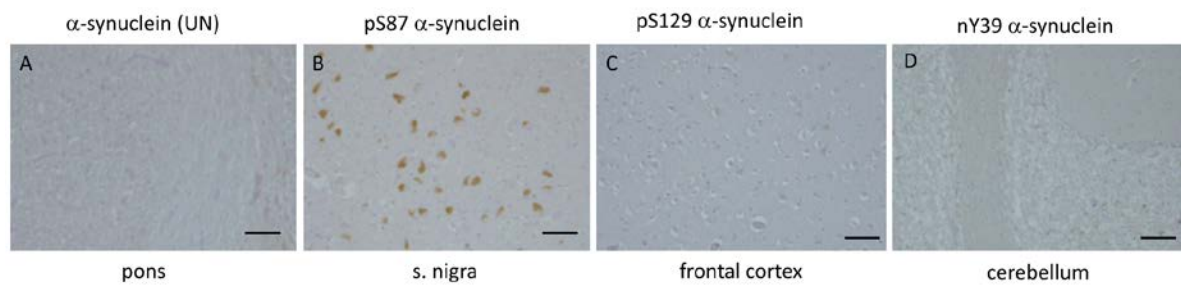

**Figure S1.** Representative immunohistochemistry illustrations of neurologically normal control cases showing no abnormal  $\alpha$ -synuclein deposits when treated with various  $\alpha$ -synuclein antibodies. Scale bar 50 $\mu$ m in all.

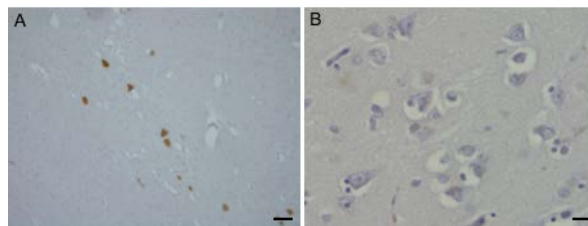

**Figure S2.** Immunohistochemistry of brain sections from IPD cases showing no appreciable staining within PD nigra (A) or frontal cortex (B) when primary antibodies were omitted but treated with anti-rabbit and anti-mouse secondaries respectively. Scale bar 60 $\mu$ m in A, 15 $\mu$ m in B.
